# Supplementary material
Source: HighWire-hosted journal article supplement (https://err.ersjournals.com/content/27/149/180019)

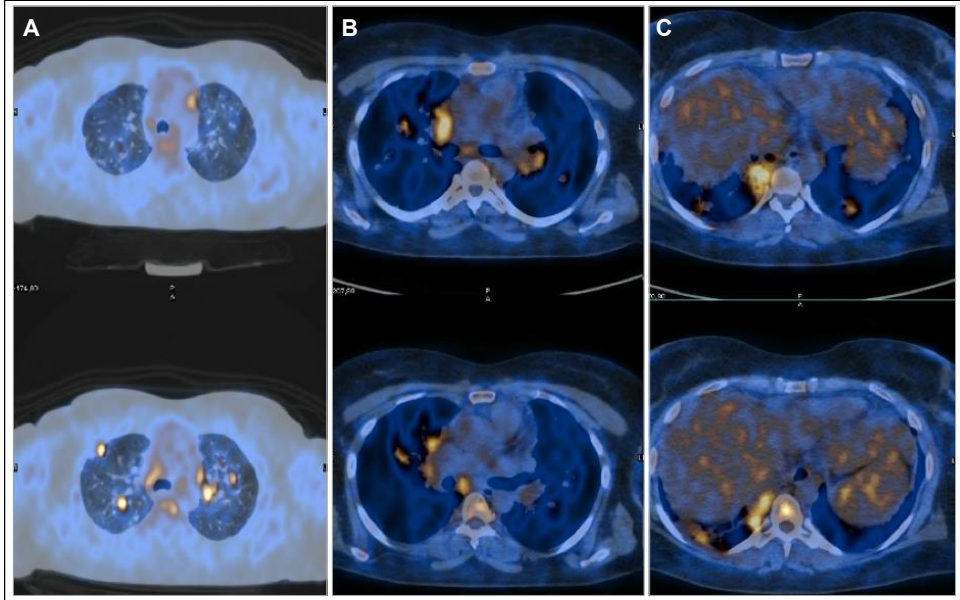

Figure S1

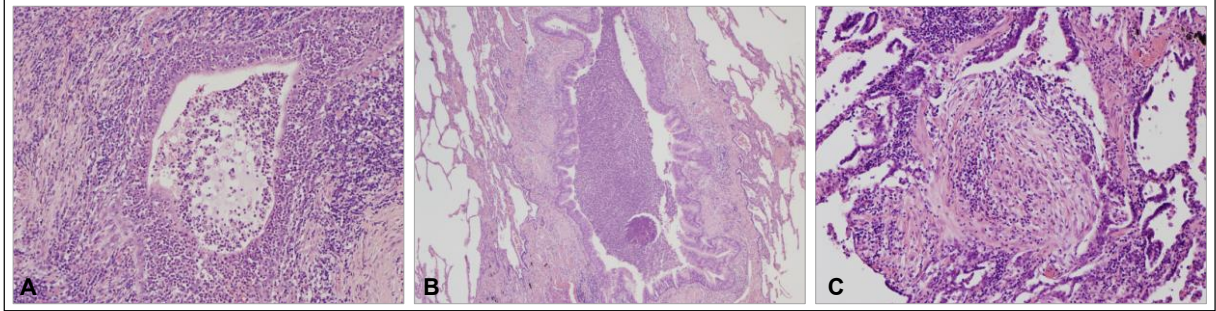

Figure S2

Supplement: inline-supplementary-material-1 [file inline-supplementary-material-1.pdf]
